# Supplementary material for: A High-Copy Suppressor Screen Reveals a Broad Role of Prefoldin-like Bud27 in the TOR Signaling Pathway in Saccharomyces cerevisiae
Source: MDPI journal article supplement (doi:10.3390/genes13050748), 2022-04-24
Supplement: s1 [file s1]

### Supplemental Table S1

Functional categories (Biological Process) for the up-regulated genes in *bud27Δ* mutant vs wild-type strain ( $\geq 2$ ), and differentially expressed than in a wild-type strain under rapamycin addition [1]. The analysis was performed using the STRING software [2] and the PPI enrichment p-value:  $<1.0\text{e-}16$  was selected.

| Functional categories                            | FDR      | Functional categories                            | FDR      |
|--------------------------------------------------|----------|--------------------------------------------------|----------|
| Cellular amino acid biosynthetic process         | 2.37e-13 | Aromatic amino acid family metabolic process     | 4.19e-06 |
| Alpha-amino acid biosynthetic process            | 4.67e-12 | Cellular biosynthetic process                    | 4.19e-06 |
| Small molecule metabolic process                 | 8.92e-12 | Cellular metabolic process                       | 2.87e-05 |
| Small molecule biosynthetic process              | 8.92e-12 | Lysine biosynthetic process via aminoadipic acid | 3.88e-05 |
| Carboxylic acid biosynthetic process             | 8.92e-12 | Organic cyclic compound biosynthetic process     | 5.50e-05 |
| Oxoacid metabolic process                        | 3.01e-11 | Metabolic process                                | 7.74e-05 |
| Cellular amino acid metabolic process            | 3.18e-11 | Organic substance metabolic process              | 0.00010  |
| Cellular process                                 | 3.43e-11 | Aromatic compound biosynthetic process           | 0.00033  |
| Alpha-amino acid metabolic process               | 3.97e-11 | Sulfur amino acid metabolic process              | 0.0027   |
| Carboxylic acid metabolic process                | 1.46e-10 | Organonitrogen compound biosynthetic process     | 0.0041   |
| Aspartate family amino acid metabolic process    | 1.73e-07 | Heterocycle biosynthetic process                 | 0.0071   |
| Aspartate family amino acid biosynthetic process | 8.48e-07 | Methionine metabolic process                     | 0.0072   |
| Organic substance biosynthetic process           | 1.70e-06 | Sulfur compound biosynthetic process             | 0.0097   |
| Lysine biosynthetic process                      | 2.08e-06 |                                                  |          |
| Aromatic amino acid family biosynthetic process  | 2.23e-06 |                                                  |          |

### Supplemental Table S2

Functional categories (Biological Process) for the down-regulated genes in *bud27Δ* mutant vs wild-type strain ( $\geq 2$ ), and differentially expressed than in a wild-type strain under rapamycin addition [1]. The analysis was performed using the STRING software [2] and the PPI enrichment p-value:  $<1.0\text{e-}16$  was selected.

---

| Functional categories                            | FDR      |
|--------------------------------------------------|----------|
| Fungal-type cell wall organization               | 2.50e-05 |
| Cell wall organization                           | 2.50e-05 |
| Cell wall organization or biogenesis             | 4.04e-05 |
| Fungal-type cell wall organization or biogenesis | 4.04e-05 |
| Carbohydrate derivative metabolic process        | 0.0018   |
| Transmembrane transport                          | 0.0032   |
| Cell wall biogenesis                             | 0.0089   |

---

1. Cuevas-Bermúdez, A.; Garrido-Godino, A.; Navarro, F., A novel yeast chromatin-enriched fractions purification approach, yChEFs, for the chromatin-associated protein analysis used for chromatin-associated and RNA-dependent chromatin-associated proteome studies from *Saccharomyces cerevisiae*. *Gene Reports* **2019**, 16, 100450.
2. Szklarczyk, D.; Morris, J. H.; Cook, H.; Kuhn, M.; Wyder, S.; Simonovic, M.; Santos, A.; Doncheva, N. T.; Roth, A.; Bork, P.; Jensen, L. J.; von Mering, C., The STRING database in 2017: quality-controlled protein-protein association networks, made broadly accessible. *Nucleic Acids Res* **2017**, 45, (D1), D362-D368.
