# Supplementary material for: A High-Copy Suppressor Screen Reveals a Broad Role of Prefoldin-like Bud27 in the TOR Signaling Pathway in Saccharomyces cerevisiae
Source: MDPI journal article supplement (doi:10.3390/genes13050748), 2022-04-24
Supplement: s1 [file s1]

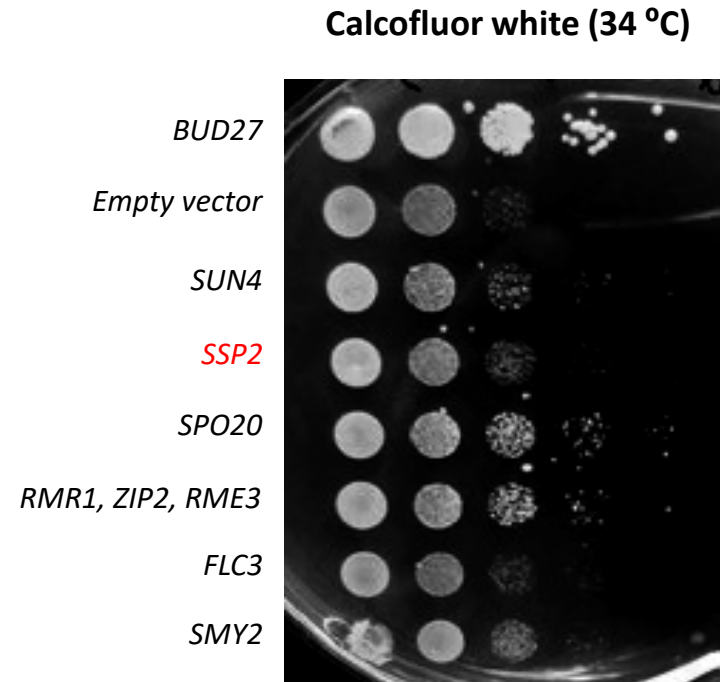

**Figure S1. Some suppressors overcome the sensitivity of the *bud27Δ* mutant to calcofluor.** A) Growth of the *bud27Δ* mutant at 34°C in SD minimal medium with calcofluor white (10 mg/ml), harboring a multicopy empty vector or multicopy vectors allowing overexpression of the indicated genes. Red denotes a putative suppressor gene.
